# Supplementary material for: Identification of LIN28B-bound mRNAs reveals features of target recognition and regulation
Source: PubMed Central journal article supplement — RNA Biol. 2013 May 29;10(7):1146–59. doi: 10.4161/rna.25194 (PMC3849162; doi:10.4161/rna.25194), 2013-05-29
Supplement: rna-10-1146-s03.pdf [file rna-10-1146-s03.pdf]

## **Supplemental Material to:**

**Robin Graf, Mathias Munschauer, Guido Mastrobuoni,  
Florian Mayr, Udo Heinemann, Stefan Kempa,  
Nikolaus Rajewsky, Markus Landthaler**

**Identification of LIN28B-bound mRNAs reveals features of  
target recognition and regulation**

**2013; 10(6)**

**<http://dx.doi.org/10.4161/rna.25194>**

**[www.landesbioscience.com/journals/rnabiology/article/25194/](http://www.landesbioscience.com/journals/rnabiology/article/25194/)**

### **Supplemental Material**

- 1. 2013RNABIOL0082R-suptbl2**
- 2. 2013RNABIOL0082R-suptbl3**

## **SUPPLEMENTARY DATA**

### **Identification of LIN28-bound mRNAs reveals features of target recognition and regulation**

Robin Graf, Mathias Munschauer, Guido Mastrobuoni, Florian Mayr, Udo Heinemann, Stefan Kempa, Nikolaus Rajewsky, and Markus Landthaler

## **TABLE AND FIGURES LEGENDS**

**Supplementary Table S1:** Overview of sequence read numbers from indicated PAR-CLIP experiments obtained after illumina sequencing and mapping of to the spliced transcriptome.

**Supplementary Table S2:** List of conservative LIN28B PAR-CLIP targets, target clusters and Log2 fold-change values obtained from pSILAC measurements of LIN28B siRNA knockdown experiments using 2 different siRNAs in biological replicate experiments.

**Supplementary Table S3:** Gene Ontology analysis

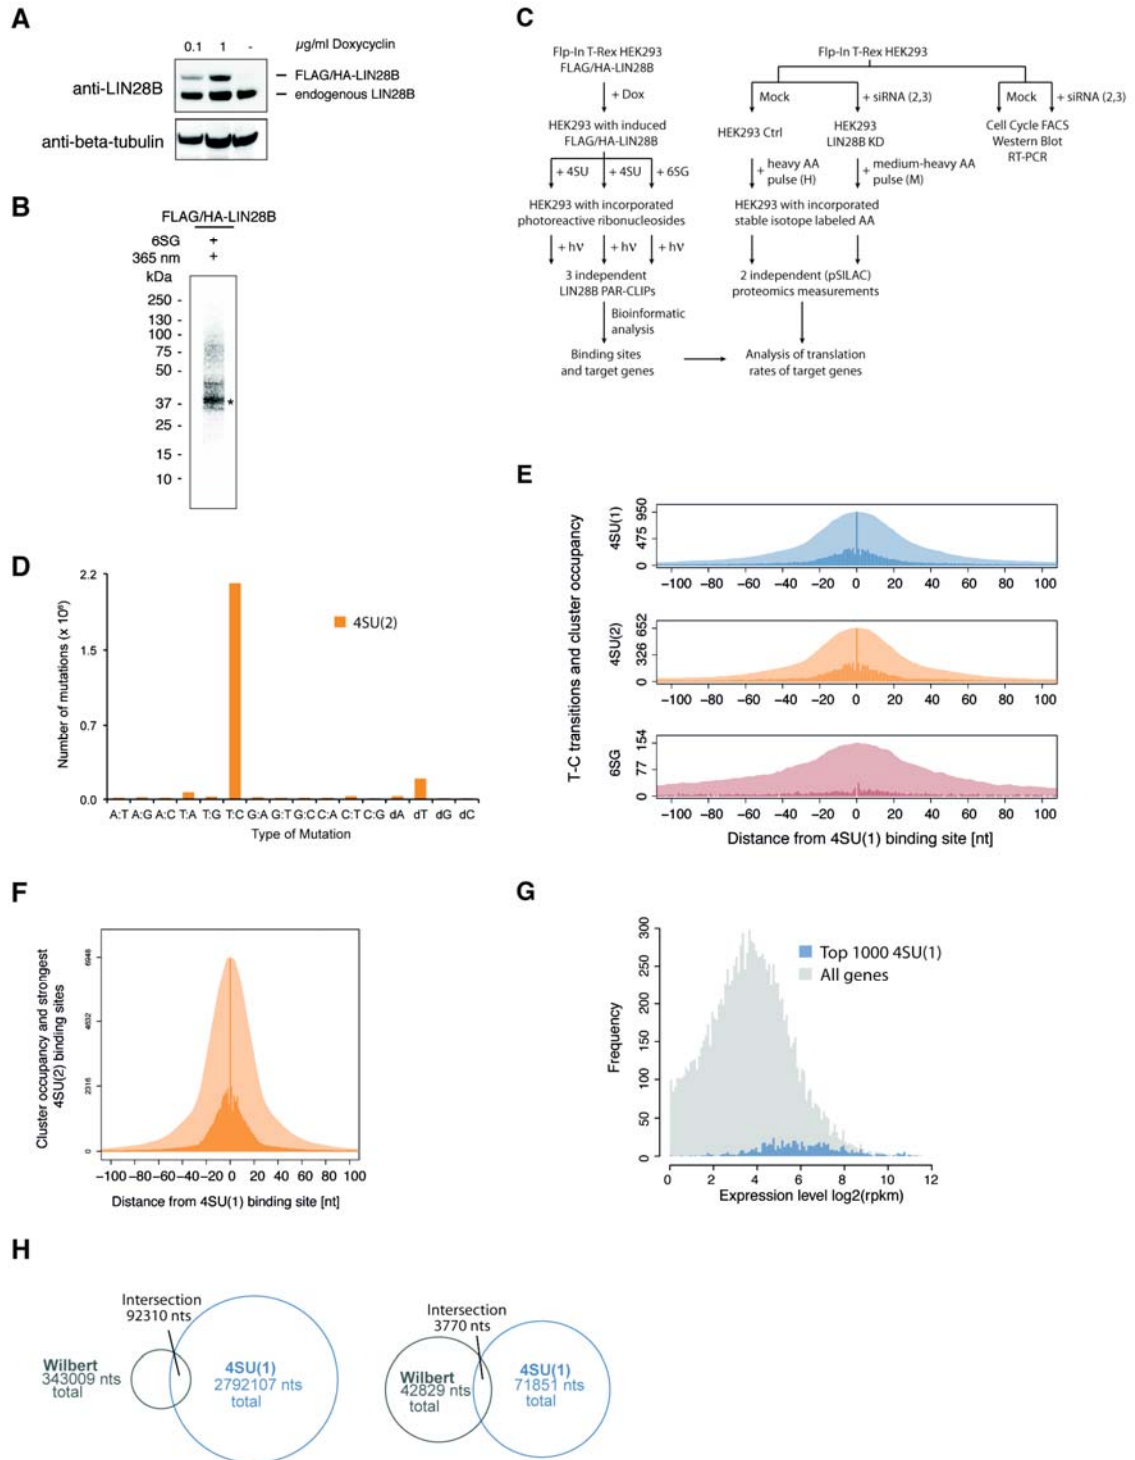

**Supplementary Figure 1:** (A) Western blot showing induction of HIS/FLAG/HA-LIN28B protein at different doxycyclin concentrations. LIN28B antibody was used for detection of FLAG/HA-tagged and endogenous LIN28B. Beta-tubulin antibody was used to control for equal loading. (B) Autoradiogram of SDS-PAGE, transferred to nitrocellulose membrane. Protein-RNA complexes

migrating at 39 kDa correspond to epitope-tagged LIN28B crosslinked to RNA using 6SG as photoreactive nucleoside. (C) Flowchart of experimental design. (D) Frequency of nucleotide mutations detected in 4SU(2) PAR-CLIP libraries after alignment to spliced human transcriptome (E) T-C transition frequency and cluster occupancy (defined as number of clusters in respective transcript region) in 4SU(1), 4SU(2) and 6SG PAR-CLIP libraries, centered on the strongest crosslinking site observed in 4SU(1) PAR-CLIP. (F) Distribution of the strongest 4SU(2) binding sites centered on the strongest 4SU(1) binding sites. T-C transition frequency and cluster occupancy is shown. (G) Histogram of RPKM values of genes covered by the top 1000 4SU (1) PAR-CLIP binding sites and of all genes. (H) Intersection of covered nucleotides in all (left) and top 1000 (right) LIN28A clusters identified by CLIP-seq in Wilbert et al. compared to nucleotides covered in 4SU(1) PAR-CLIP library.

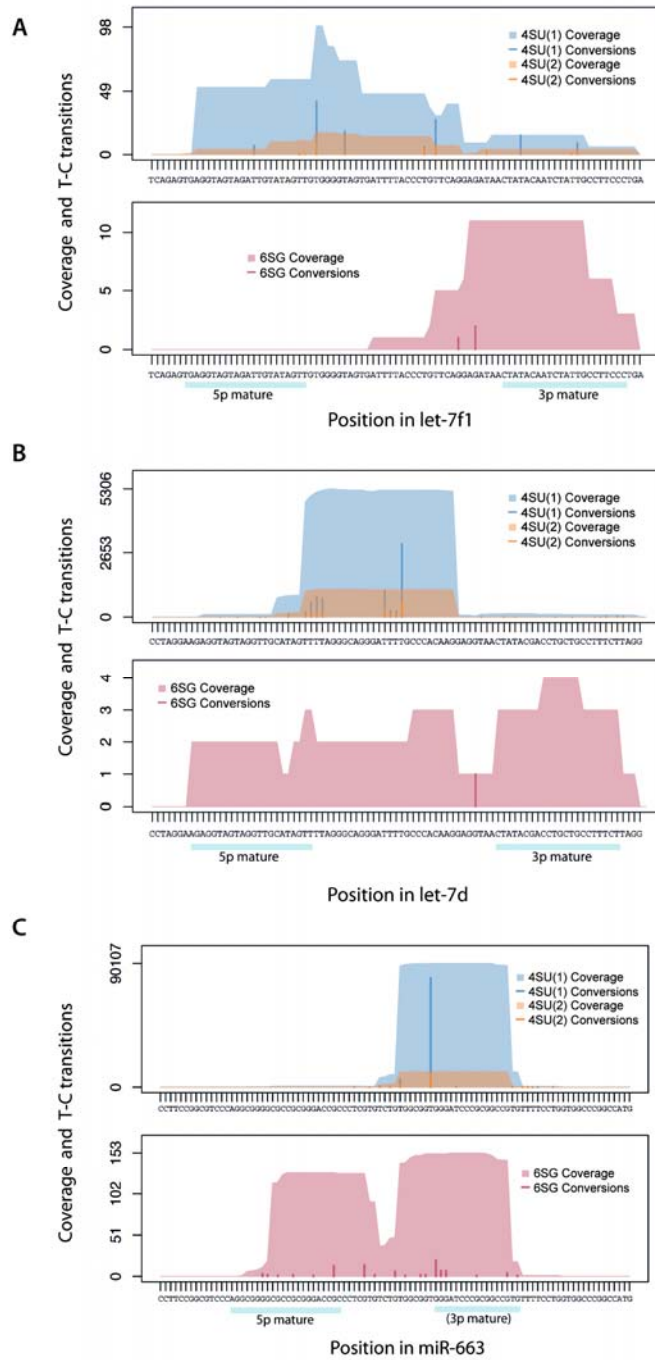

**Supplemental Figure 2:** (A-C) Alignment of sequence coverage signal and diagnostic nucleotide transitions observed in 4SU (1) (blue), 4SU (2) (orange) and 6SG (dark red) libraries to genomic regions encoding let-7f1, let-7d and miR-663 precursors.

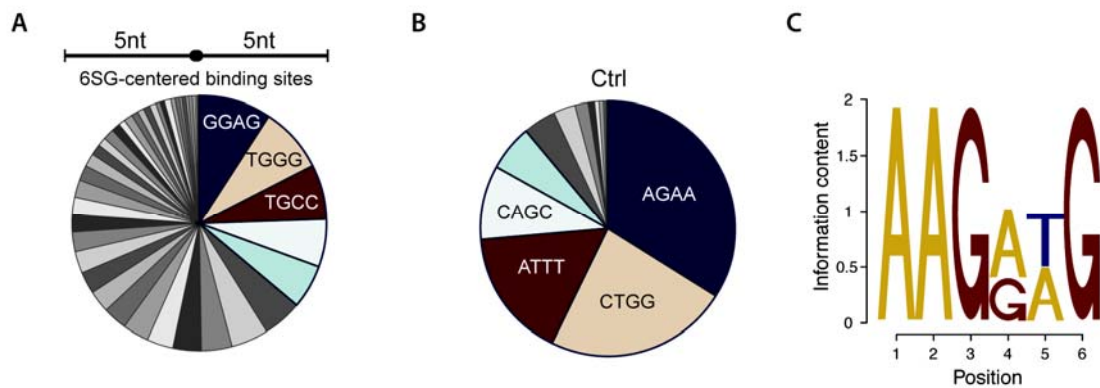

**Supplemental Figure 3:** (A) Most frequent tetramers in 6SG centered 3'UTR binding sites (extended by 5 nt upstream and downstream) within conservative cluster set. (B) Most frequent tetramer within G centered random control clusters derived from conservative cluster set. (C) Top sequence motif identified by MEME in top 300 6SG centered CDS binding sites.

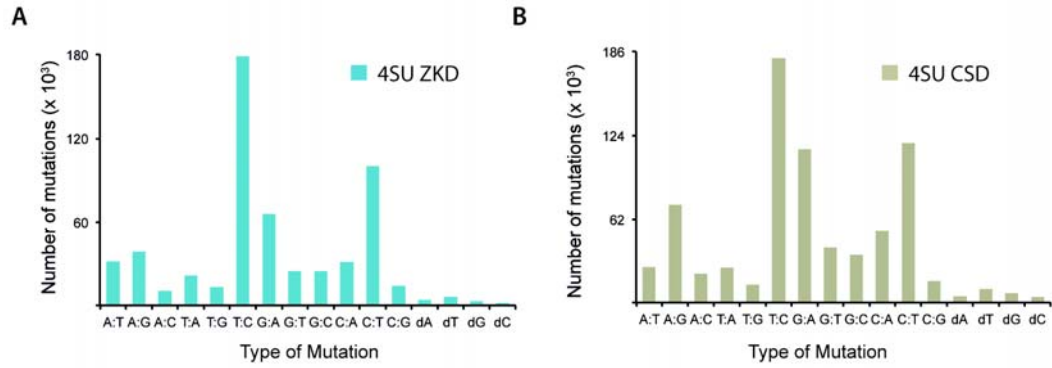

**Supplementary Figure 4:** (A and B) Frequency of nucleotide mutations detected in ZKD (A) and CSD (B) iDo-PAR-CLIP libraries after alignment to spliced human transcriptome. dA, dT, dG and dC indicate respective nucleotide deletions.

**A**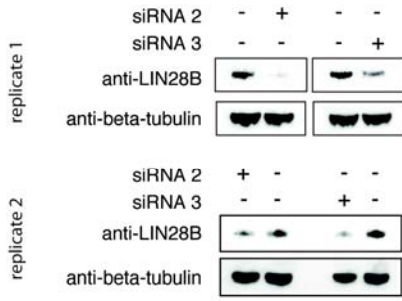**B**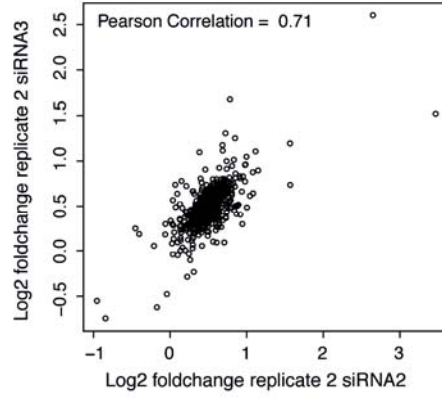**C**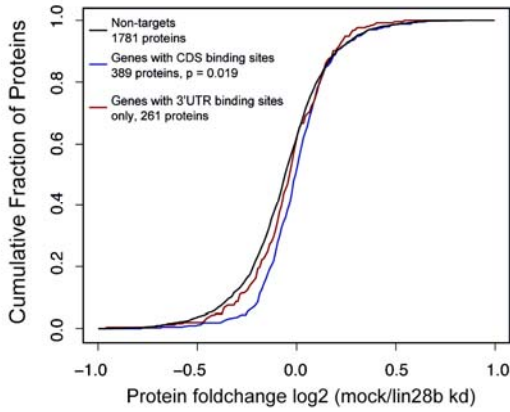**D**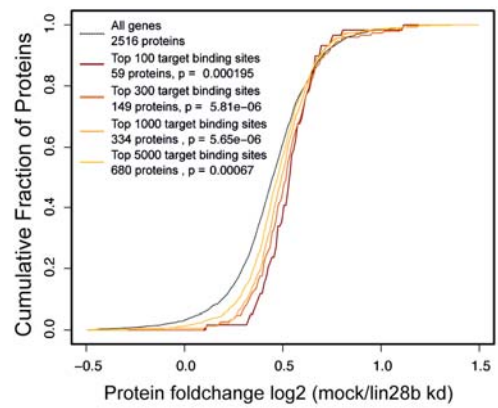**E**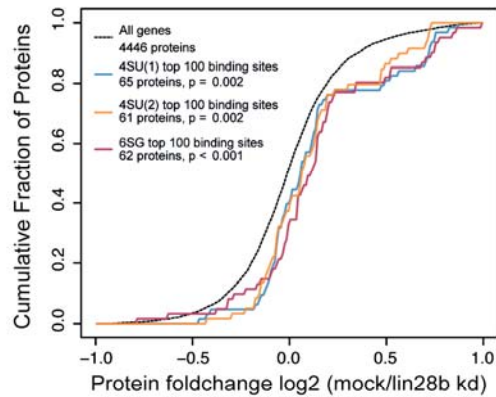**F**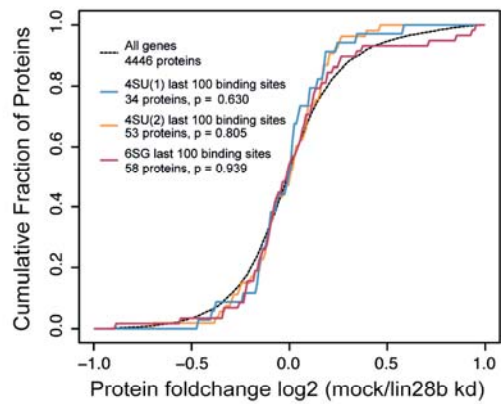**G**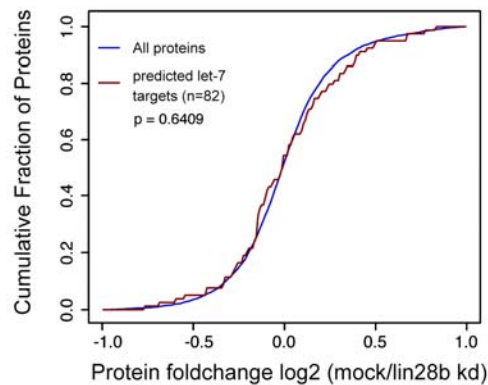



**Supplementary Figure 5:** (A) Western blot of LIN28B siRNA knock down for samples used in pulsed SILAC proteomics experiments (replicate 1 and 2, siRNA 1 and 2, respectively). Anti-beta-tubulin was used to control for equal gel loading. (B) Correlation of log<sub>2</sub> foldchanges observed in replicate pSILAC experiments (C) Cumulative density of log<sub>2</sub> transformed changes in newly synthesized protein levels, measured by pulsed SILAC upon LIN28B knock down (pSILAC data from siRNA2, replicate 2 is shown). (D) Cumulative density of log<sub>2</sub> transformed changes in newly synthesized protein levels upon LIN28B knock down. Genes covered by the top 5000, 1000, 300 and 100 conservative PAR-CLIP binding sites are shown (pSILAC data from siRNA3, replicate 2 is shown). (E) Cumulative density of log<sub>2</sub> transformed changes in newly synthesized protein levels. The group of genes mapping to the top 100 binding sites in 4SU (1), 4SU (2) and 6SG PAR-CLIP are compared to all target genes. (F) As in (E), but comparing the group of genes corresponding to the 100 lowest ranked binding sites in 4SU (1), 4SU (2) and 6SG PAR-CLIPs. (G) Cumulative density of log<sub>2</sub> transformed changes in newly synthesized protein levels. Genes harboring PicTar predicted let-7 binding sites are compared to all genes. All shown p-values are based on Wilcoxon test.

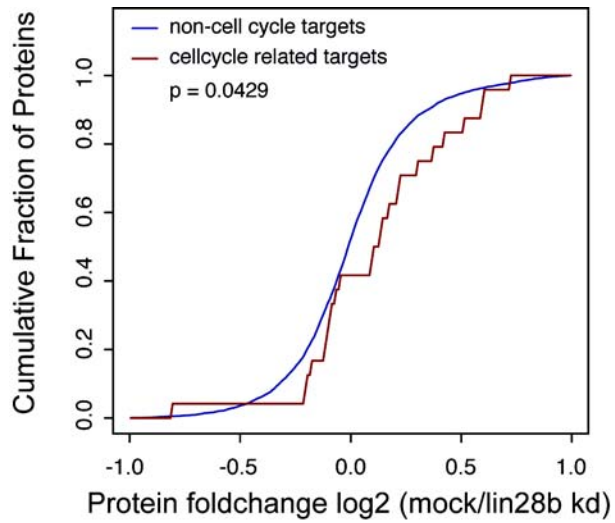

**Supplementary Figure 6:** Cumulative density of log<sub>2</sub> transformed changes in newly synthesized protein levels, measured by pulsed SILAC upon LIN28B knock down. Cell cycle related targets are compared to targets unrelated to cell cycle. P-values are based on Wilcoxon test.

**Supplementary Table S1:** Overview of sequence read numbers from indicated PAR-CLIP experiments obtained after illumina sequencing and mapping of to the spliced transcriptome.

| <b>PAR-CLIP</b> | <b>Clipped reads</b> | <b>Mapped reads*</b> | <b>Perfect mapping</b> | <b>Modified mapping</b> | <b>Modifications</b> | <b>T:C</b> | <b>G:A</b> | <b>deI</b> | <b>deG</b> | <b>No. of clusters</b> |
|-----------------|----------------------|----------------------|------------------------|-------------------------|----------------------|------------|------------|------------|------------|------------------------|
| LIN28B_4SU_1    | 25718193             | 6997431              | 541009                 | 6456422                 | 8820758              | 6854674    | 83694      | 842730     | 66997      | 65592                  |
| LIN28B_4SU_2    | 7531061              | 1917636              | 118741                 | 1798895                 | 2605525              | 2113088    | 19611      | 203383     | 13049      | 72672                  |
| LIN28B_6SG      | 2760258              | 324675               | 162737                 | 161938                  | 187958               | 19365      | 48493      | 6156       | 14510      | 3563                   |
| LIN28B_4SU_ZKD  | 8133712              | 658559               | 235965                 | 422594                  | 598890               | 178837     | 66012      | 6185       | 3146       |                        |
| LIN28B_4SU_CSD  | 6086297              | 751654               | 241318                 | 510336                  | 753825               | 180968     | 113981     | 9963       | 6740       |                        |

\*to spliced RNA
